# Supplementary material for: A chalcone-based fluorescent responsive probe for selective detection of nitroreductase activity in bacteria
Source: Royal Society of Chemistry journal article supplement (doi:10.1039/d1nj01794b), 2021-01-01
Supplement: d1nj01794b1.pdf [file d1nj01794b1.pdf]

## Supporting Information

### A Chalcone-based Fluorescent Responsive Probe for Selective Detection of Nitroreductase Activity in Bacteria

Sirilak Wangngae,<sup>a</sup> Thitima Pewklang,<sup>a</sup> Kantapat Chansaenpak,<sup>b</sup> Phongsakorn Ganta,<sup>c</sup> Suphanida Worakaensai,<sup>a</sup> Kittipan Siwawannapong,<sup>a</sup> Surayut Kluaiphanngam,<sup>a</sup> Nawarat Nantapong,<sup>c</sup> Rung-Yi Lai,<sup>\*a</sup> Anyanee Kamkaew,<sup>\*a</sup>

<sup>a</sup>*School of Chemistry, Institute of Science, Suranaree University of Technology, Nakhon Ratchasima, Thailand 30000.*

<sup>b</sup>*National Nanotechnology Center, National Science and Technology Development Agency, Thailand Science Park, Pathum Thani, Thailand 12120.*

<sup>c</sup>*School of Preclinical Sciences, Institute of Science, Suranaree University of Technology, Nakhon Ratchasima, Thailand.*

\*Correspondence: [anyanee@sut.ac.th](mailto:anyanee@sut.ac.th); [rylai@sut.ac.th](mailto:rylai@sut.ac.th)

## Materials and Methods

All reagents were purchased from commercial sources (Sigma Aldrich, TCI, Carlo Erba, Acros, and Merck) and used without further purification. The reactions were monitored by thin-layer chromatography carried out on silica gel plates (60F254, MERCK, Germany) and visualized by UV light (254 nm). Column chromatography was performed over silica gel 60 (70–230 mesh, MERCK, Germany). NMR spectra were recorded on a Bruker-500 MHz spectrometer ( $^1\text{H}$  at 500 MHz and  $^{13}\text{C}$  at 125 MHz) at room temperature unless other mentioned. Chemical shifts of  $^1\text{H}$  NMR are reported in ppm from the solvent resonance ( $\text{CDCl}_3$  7.26 ppm,  $\text{CD}_3\text{OD}$  3.30 ppm). Data are reported as the followings: chemical shift, multiplicity (s = singlet, br = broad, d = doublet, t = triplet, q = quartet, m = multiplet), coupling constants, and number of protons. Proton decoupled  $^{13}\text{C}$  NMR spectra were also recorded in ppm ( $\text{CDCl}_3$  77.0,  $\text{CD}_3\text{OD}$  49.1 ppm). Analytical thin layer chromatography (TLC) was performed on EM Reagents 0.25 mm silica-gel 60-F plates and visualized with UV light. Flash chromatography was performed using silica gel 60 (230–400 mesh). Mass spectrometry was measured under ESI conditions.

### General procedure for the preparation of chalcones (3a-c)

4-Dimethylamino acetophenone **1** (0.67 mmol) and different substituted (*o*-, *m*-, or *p*-) nitrobenzaldehydes **2** (0.67 mmol) in MeOH (2 mL) were added in 2 mL of MeOH containing KOH (3.35 mmol). The mixture was stirred for 18 h at room temperature (25 °C). After that, the yellow precipitate was filtered off followed by washing with ice cold MeOH (20 mL), and finally dried under vacuum. The products were obtained as the corresponding chalcones (**3a-c**).

### General procedure for the reduction of chalcones (4a-c)

A mixture of chalcone (**3a**, **3b**, or **3c**) (50 mg, 0.168 mmol) and  $\text{SnCl}_2 \cdot 2\text{H}_2\text{O}$  (190 mg, 0.84 mmol) in THF (1 mL) was sonicated at 50 °C for 20 min. The mixture was diluted with ethyl acetate (10 mL) and washed with brine three times. The organic layer was collected and dried with  $\text{MgSO}_4$ . After removal of the solvent, the product was purified on a silica-gel column using ethyl acetate/hexanes (1:1 v/v) as the eluent to give the corresponding product (**4a-c**) as a yellow solid.

### 1. <sup>1</sup>H NMR, <sup>13</sup>C NMR, and MS results of compound 3a-c

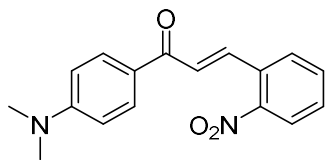

#### (*E*)-1-(4-(dimethylamino)phenyl)-3-(2-nitrophenyl)prop-2-en-1-one (3a)

95.30 mg, 48% yield; <sup>1</sup>H NMR (500 MHz, CDCl<sub>3</sub>) δ 8.15 – 8.07 (m, 4H), 7.81 (d, *J* = 8.5 Hz, 1H), 7.75 (d, *J* = 8.0 Hz, 1H), 7.66 (ddt, *J* = 8.5, 6.5, 2.0 Hz, 1H), 7.43 (td, *J* = 6.5, 1.5 Hz, 1H), 6.82 (d, *J* = 9.0 Hz, 2H), 3.03 (s, 6H), <sup>13</sup>C NMR (125 MHz, CDCl<sub>3</sub>) δ 157.4, 151.6, 136.6, 129.6, 129.3, 128.7, 127.5, 126.8, 125.6, 118.5, 112.4, 40.5, HRMS (ESI) calcd for C<sub>17</sub>H<sub>16</sub>N<sub>2</sub>NaO<sub>3</sub> [M+Na]<sup>+</sup> = 319.1053, found 319.1061.

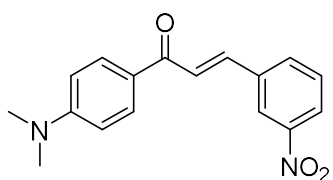

#### (*E*)-1-(4-(dimethylamino)phenyl)-3-(3-nitrophenyl)prop-2-en-1-one (3b)

129.05 mg, 65% yield; <sup>1</sup>H NMR (500 MHz, CDCl<sub>3</sub>) δ 8.49 (t, *J* = 2.0 Hz, 1H), 8.20 (ddd, *J* = 8.2, 2.3, 1.1 Hz, 1H), 8.01 (d, *J* = 9.0 Hz, 2H), 7.88 (d, *J* = 7.5 Hz, 1H), 7.77 (d, *J* = 16.0 Hz, 1H), 7.67 (d, *J* = 16.0 Hz, 1H), 7.57 (t, *J* = 8.0 Hz, 1H), 6.74 (d, *J* = 9.0 Hz, 2H), 3.09 (s, 6H), <sup>13</sup>C NMR (125 MHz, CDCl<sub>3</sub>) δ 187.0, 153.7, 148.9, 139.7, 137.5, 134.5, 131.2, 130.1, 126.0, 125.1, 124.3, 122.2, 111.4, 40.5, HRMS (ESI) calcd for C<sub>17</sub>H<sub>16</sub>N<sub>2</sub>NaO<sub>3</sub> [M+Na]<sup>+</sup> = 319.1053, found 319.1063.

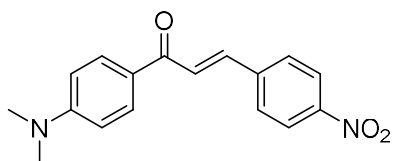

#### (*E*)-1-(4-(dimethylamino)phenyl)-3-(4-nitrophenyl)prop-2-en-1-one (3c)

154.86 mg, 78% yield; <sup>1</sup>H NMR (500 MHz, CDCl<sub>3</sub>) δ 8.24 (d, *J* = 9.0 Hz, 2H), 7.99 (d, *J* = 9.0 Hz, 2H), 7.77 (d, *J* = 15.5 Hz, 1H), 7.74 (d, *J* = 8.5 Hz, 2H), 7.66 (d, *J* = 15.5 Hz, 1H), 6.74 (d, *J* = 9.0 Hz, 2H), 3.09 (s, 6H), <sup>13</sup>C NMR (125 MHz, CDCl<sub>3</sub>) δ 186.9, 153.7, 148.4, 142.0, 139.7, 131.3, 128.9, 126.3, 126.1, 124.4, 111.5, 40.5, HRMS (ESI) calcd for C<sub>17</sub>H<sub>16</sub>N<sub>2</sub>NaO<sub>3</sub> [M+Na]<sup>+</sup> = 319.1053, found 319.1065.

## 2. <sup>1</sup>H NMR, <sup>13</sup>C NMR, and MS results of compound 4a-c

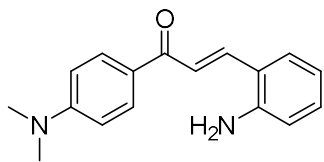

### (*E*)-3-(2-aminophenyl)-1-(4-(dimethylamino)phenyl)prop-2-en-1-one (4a)

13.42 mg, 30% yield; <sup>1</sup>H NMR (500 MHz, DMSO-*d*<sub>6</sub>) δ 8.07 (d, *J* = 9.0 Hz, 2H), 7.77 (d, *J* = 15.5 Hz, 1H), 7.57 (d, *J* = 15.5 Hz, 1H), 7.17 (t, *J* = 7.5 Hz, 1H), 7.07 (d, *J* = 8.0 Hz, 1H), 7.02 (t, *J* = 2.5 Hz, 1H), 6.84 (d, *J* = 9.0 Hz, 2H), 6.76 – 6.66 (m, 1H), 5.25 (s, 2H), 3.12 (s, 6H), <sup>13</sup>C NMR (125 MHz, DMSO) δ 186.6, 153.8, 149.5, 143.2, 136.0, 131.0, 129.8, 125.7, 121.7, 116.8, 116.5, 113.9, 111.3, 40.1, HRMS (ESI) calcd for C<sub>17</sub>H<sub>19</sub>N<sub>2</sub>O<sub>1</sub> [M+H]<sup>+</sup> = 267.1492, found 267.1482.

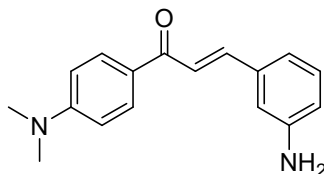

### (*E*)-3-(3-aminophenyl)-1-(4-(dimethylamino)phenyl)prop-2-en-1-one (4b)

18.77 mg, 42% yield; <sup>1</sup>H NMR (500 MHz, DMSO-*d*<sub>6</sub>) δ 8.07 (d, *J* = 9.0 Hz, 2H), 7.77 (d, *J* = 15.5 Hz, 1H), 7.56 (d, *J* = 15.5 Hz, 1H), 7.17 (t, *J* = 7.5 Hz, 1H), 7.07 (d, *J* = 7.5 Hz, 1H), 7.02 (t, *J* = 2.0 Hz, 1H), 6.84 (q, *J* = 2.0 Hz, 2H), 6.77 – 6.68 (m, 1H), 5.25 (s, 2H), 3.12 (s, 6H), <sup>13</sup>C NMR (125 MHz, DMSO) δ 186.6, 153.8, 149.5, 143.2, 136.0, 131.0, 129.8, 125.7, 121.7, 116.8, 116.5, 113.9, 111.3, 40.1, HRMS (ESI) calcd for C<sub>17</sub>H<sub>19</sub>N<sub>2</sub>O<sub>1</sub> [M+H]<sup>+</sup> = 267.1490, found 267.1492.

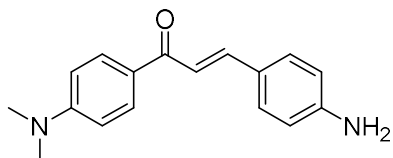

### (*E*)-3-(4-aminophenyl)-1-(4-(dimethylamino)phenyl)prop-2-en-1-one (4c)

25.92 mg, 58% yield; <sup>1</sup>H NMR (500 MHz, DMSO-*d*<sub>6</sub>) δ 8.06 (d, *J* = 8.5 Hz, 2H), 7.62 – 7.57 (m, 4H), 6.82 (d, *J* = 9.0 Hz, 2H), 6.67 (d, *J* = 8.5 Hz, 2H), 5.83 (s, 2H), 3.11 (s, 6H), <sup>13</sup>C NMR (125 MHz, DMSO) δ 186.6, 153.5, 151.9, 143.6, 131.0, 130.7, 126.3, 122.9, 116.2, 114.1, 111.3, 40.1, HRMS (ESI) calcd for C<sub>17</sub>H<sub>19</sub>N<sub>2</sub>O<sub>1</sub> [M+H]<sup>+</sup> = 267.1497, found 267.1492.

### 3. Spectrum NMR of chalcones (3a-c)

#### <sup>1</sup>H NMR of compound 3a

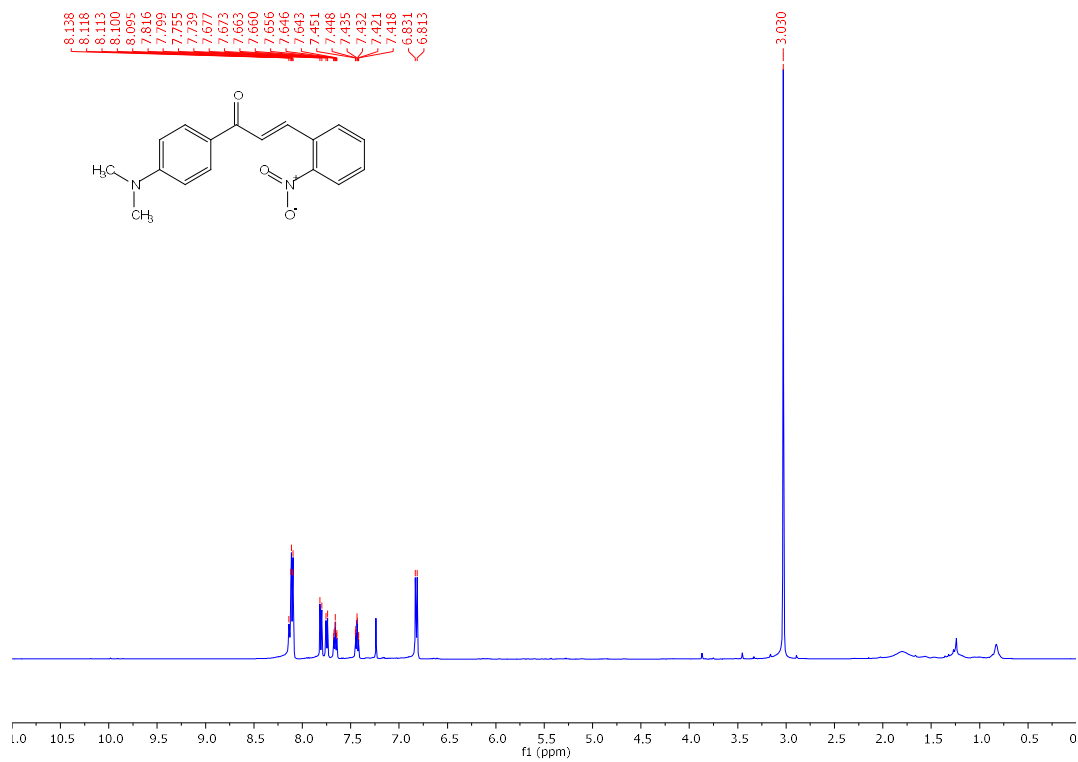

#### <sup>13</sup>C NMR of compound 3c

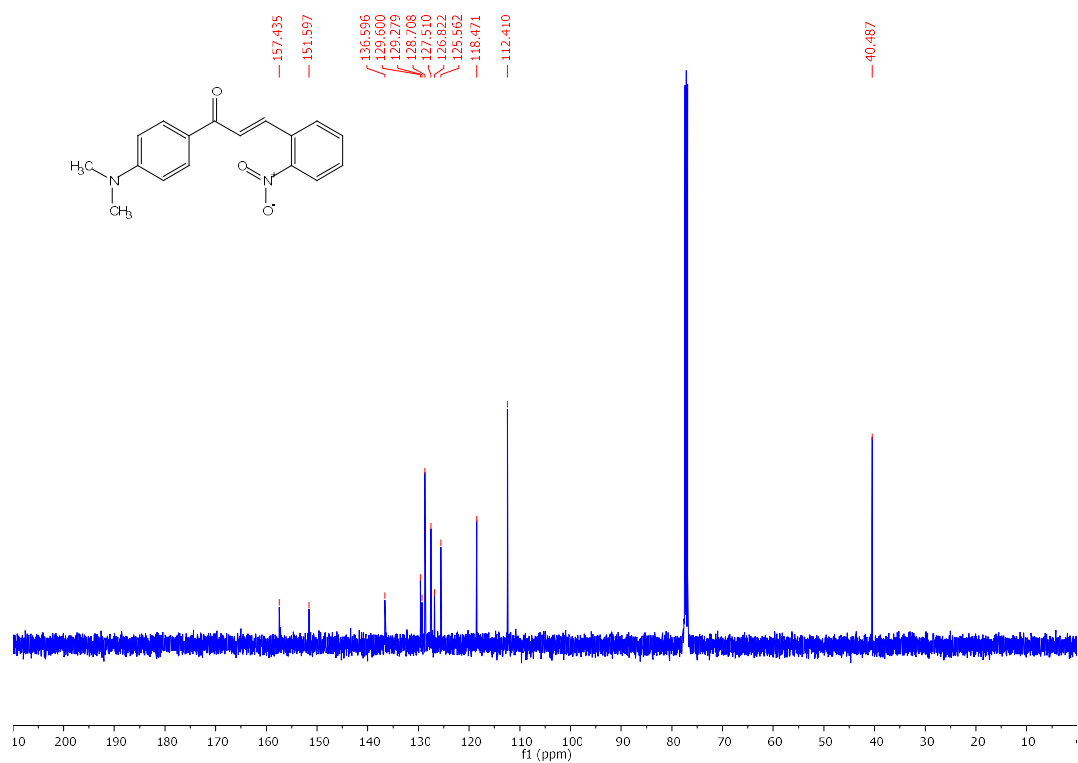

### <sup>1</sup>H NMR of compound 3b

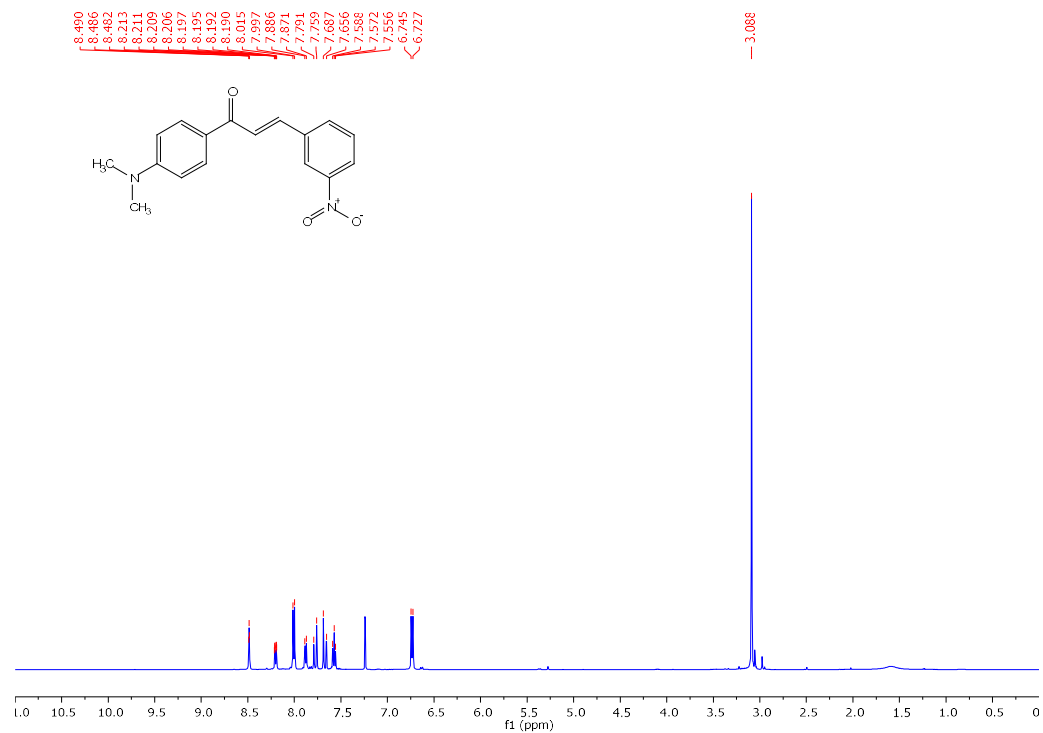

### <sup>13</sup>C NMR of compound 3b

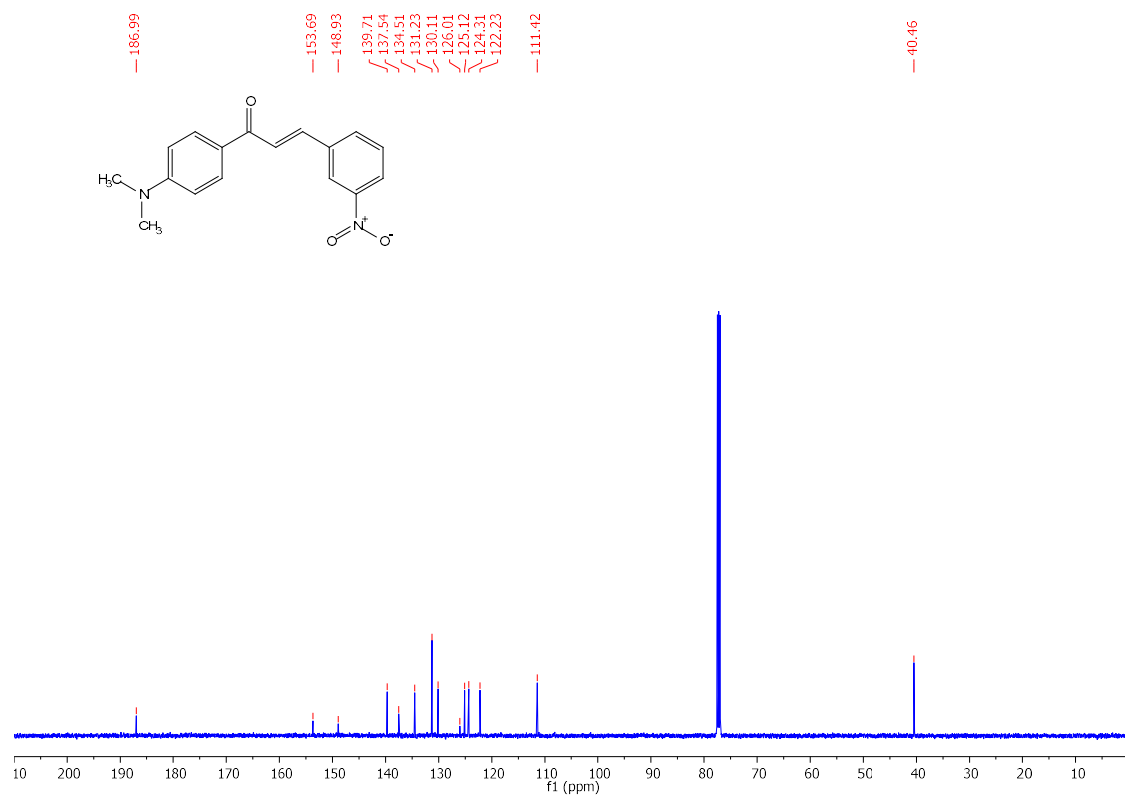

### <sup>1</sup>H NMR of compound 3c

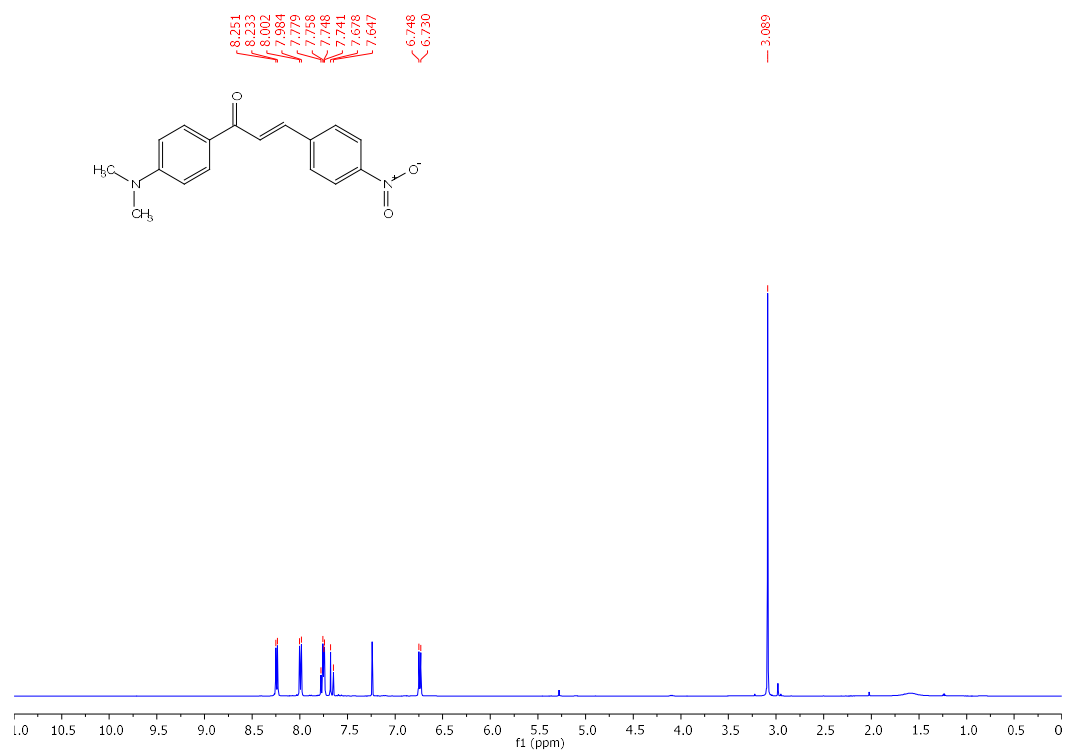

<sup>13</sup>C NMR of compound 3c

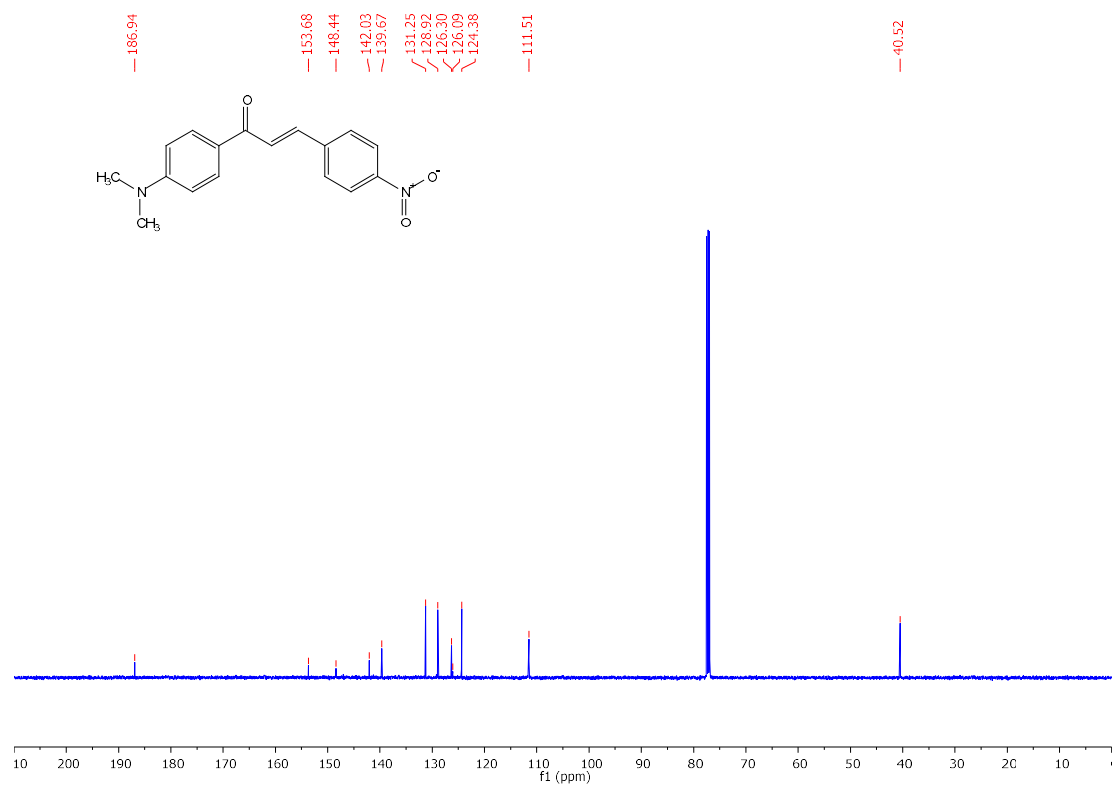

#### 4. Spectrum NMR of chalcones (4a-c)

### <sup>1</sup>H NMR of compound 4a

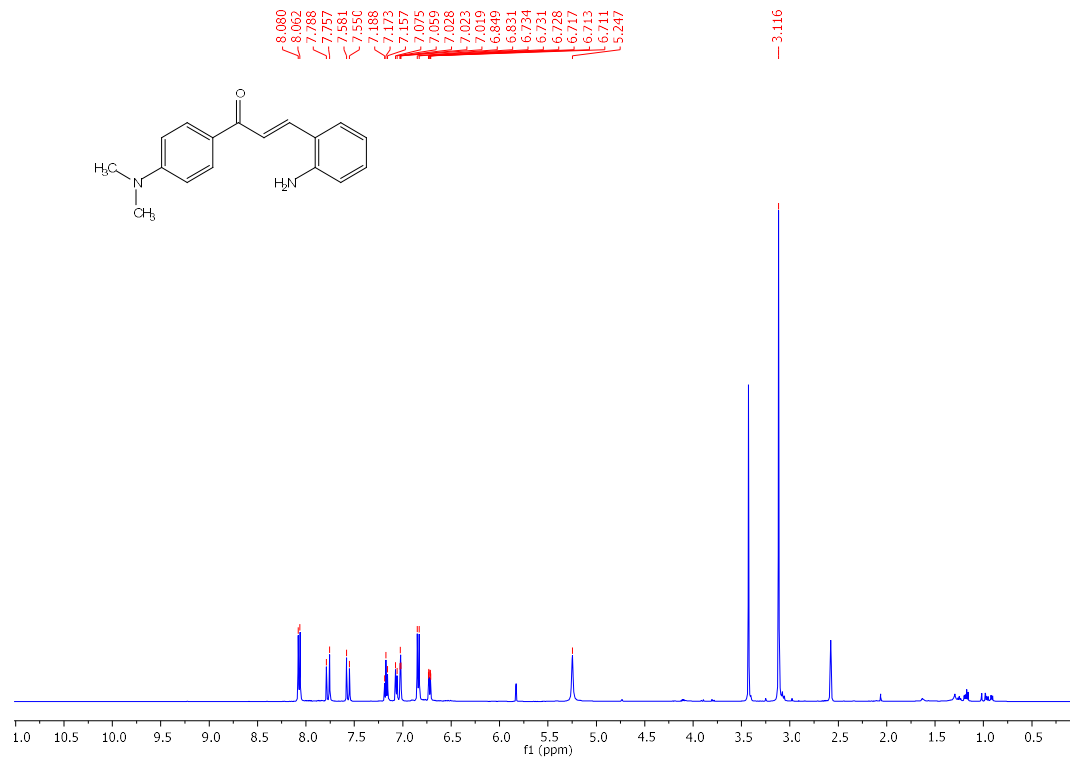

### <sup>13</sup>C NMR of compound 4a

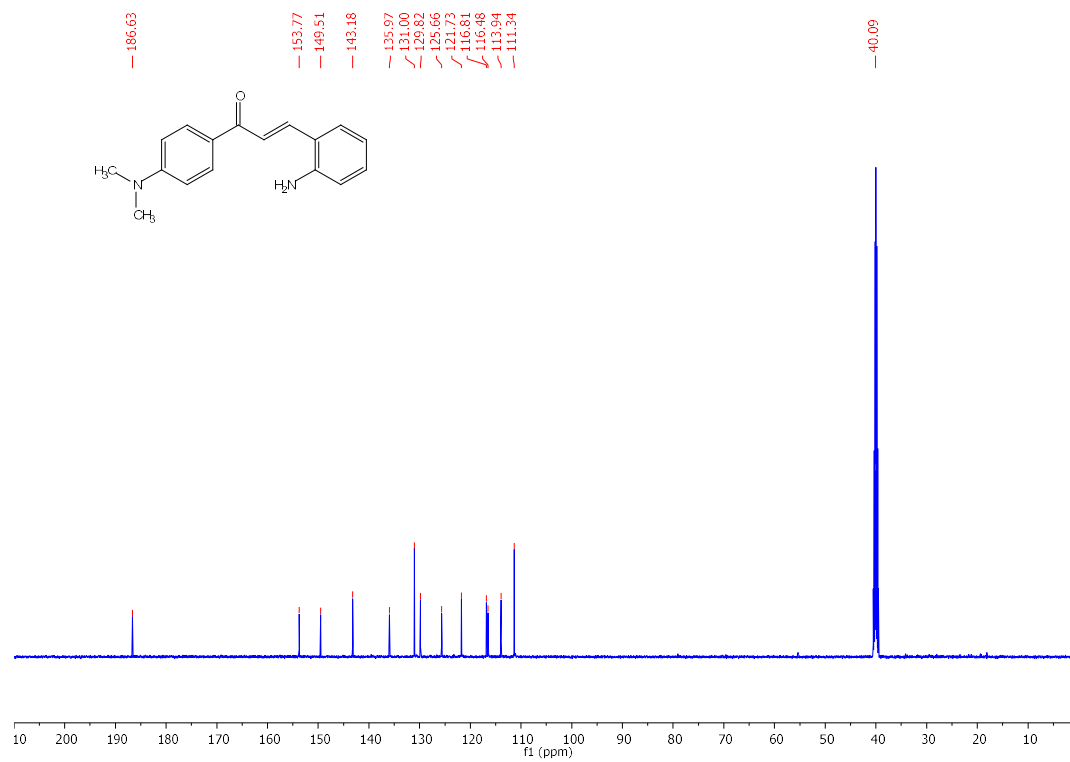

### <sup>1</sup>H NMR of compound 4b



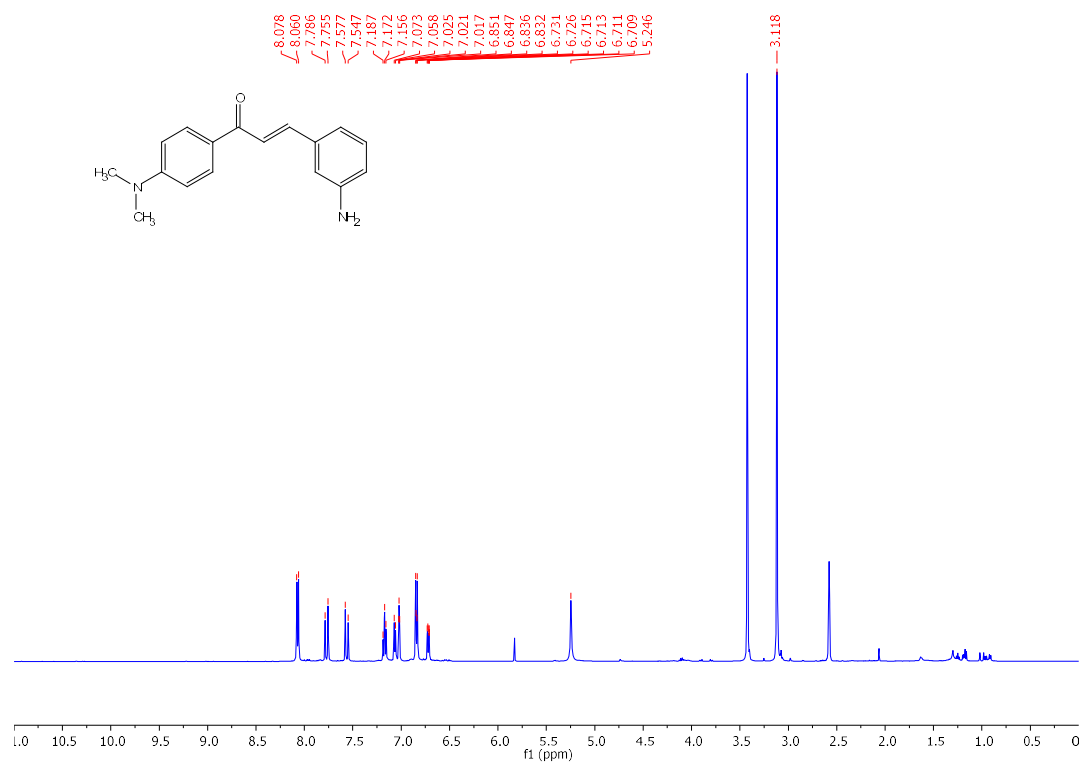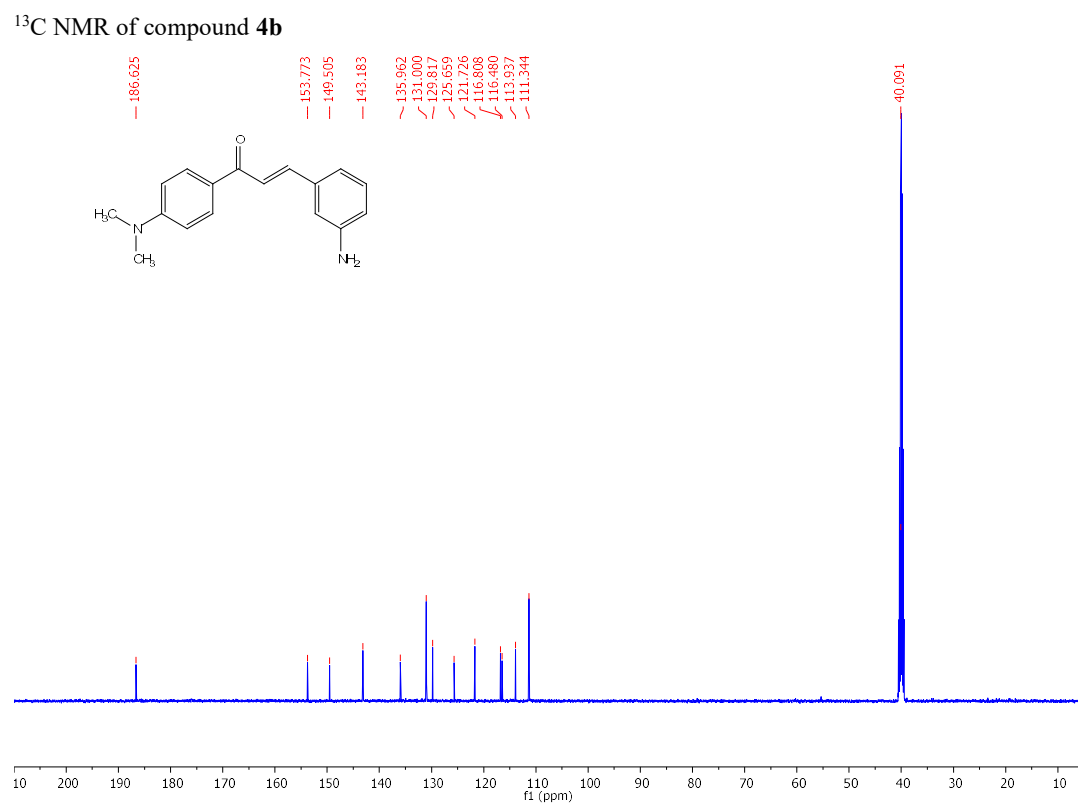

**<sup>1</sup>H NMR of compound 4c**

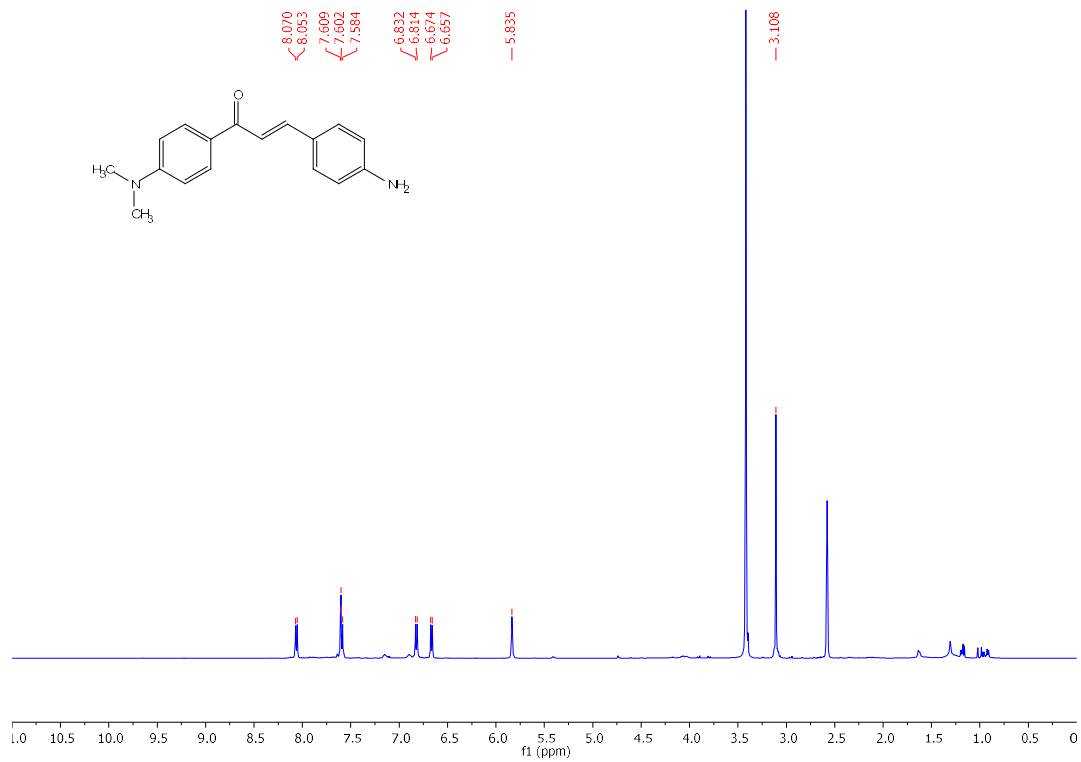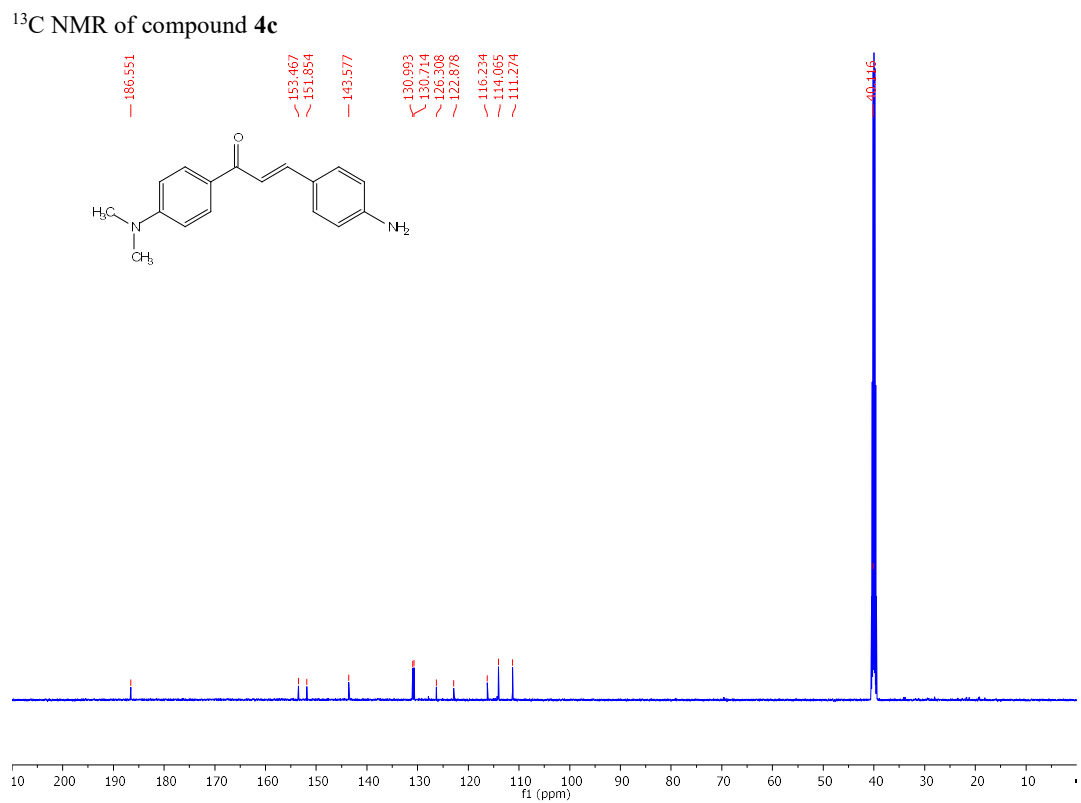

## 5. Absorption and fluorescence spectroscopic analyses

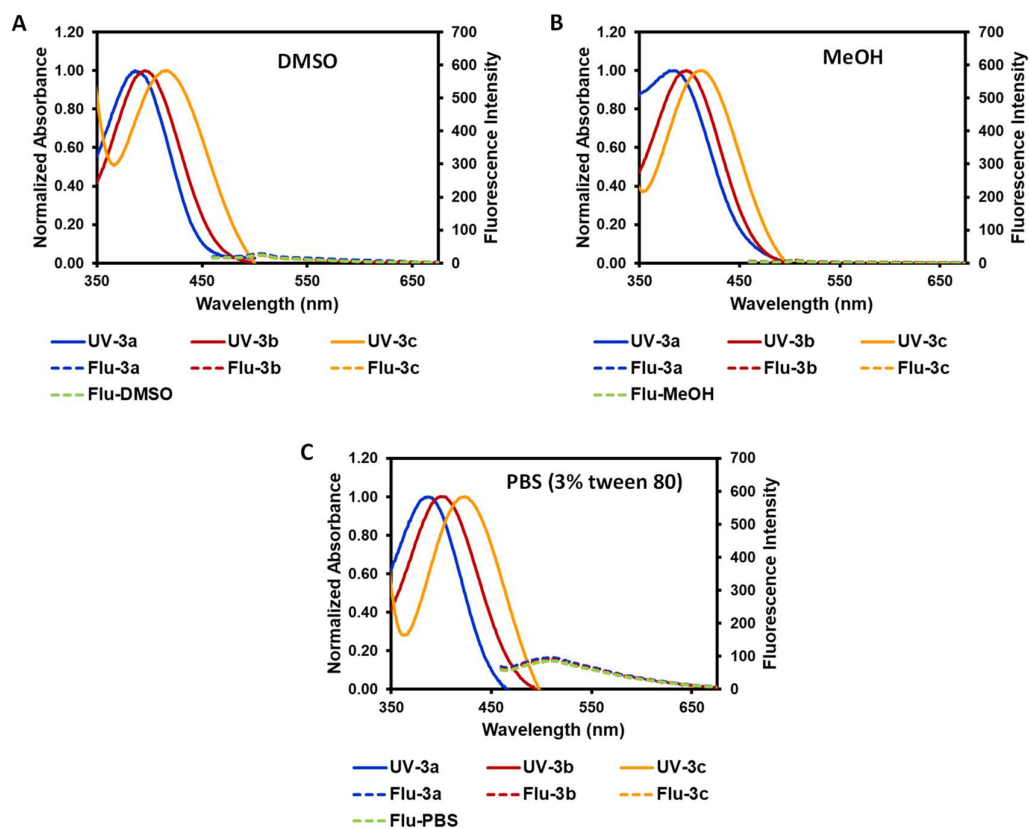

**Fig S1.** Absorption and fluorescence spectra of chalcones **3a-c** in DMSO (A), MeOH (B), and PBS (C),  $\lambda_{\text{ex}} = 405$  nm.

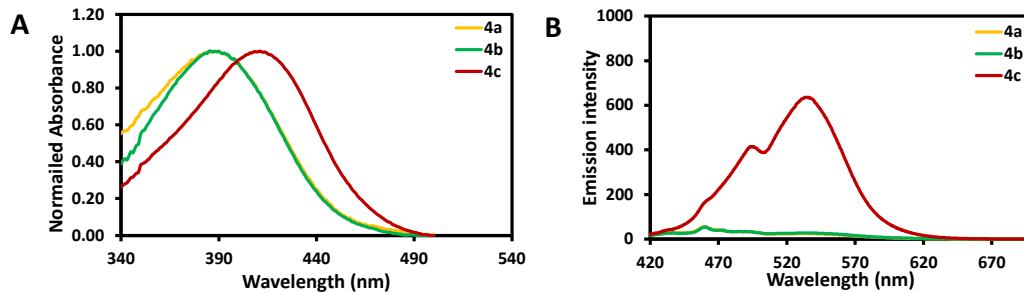

**Fig S2.** (A) Absorption and (B) fluorescence spectra of chalcones **4a-c** in MeOH,  $\lambda_{\text{ex}} = 405$  nm.

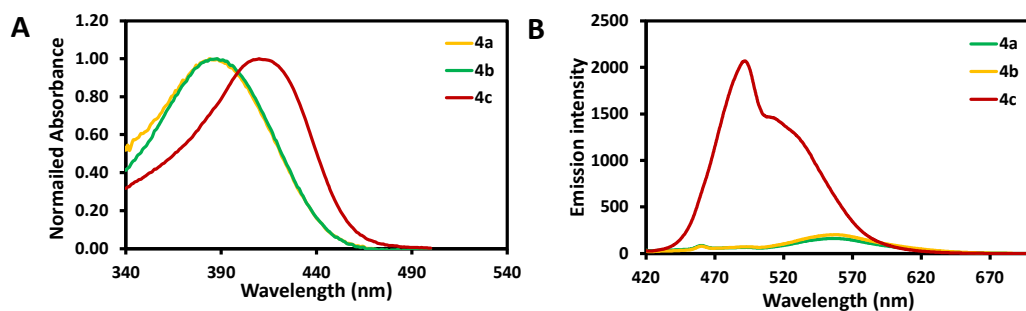

Fig S3. (A) Absorption and (B) fluorescence spectra of chalcones **4a-c** in DMSO,  $\lambda_{\text{ex}} = 405$  nm.

## 6. Optimizations in the Gas phase

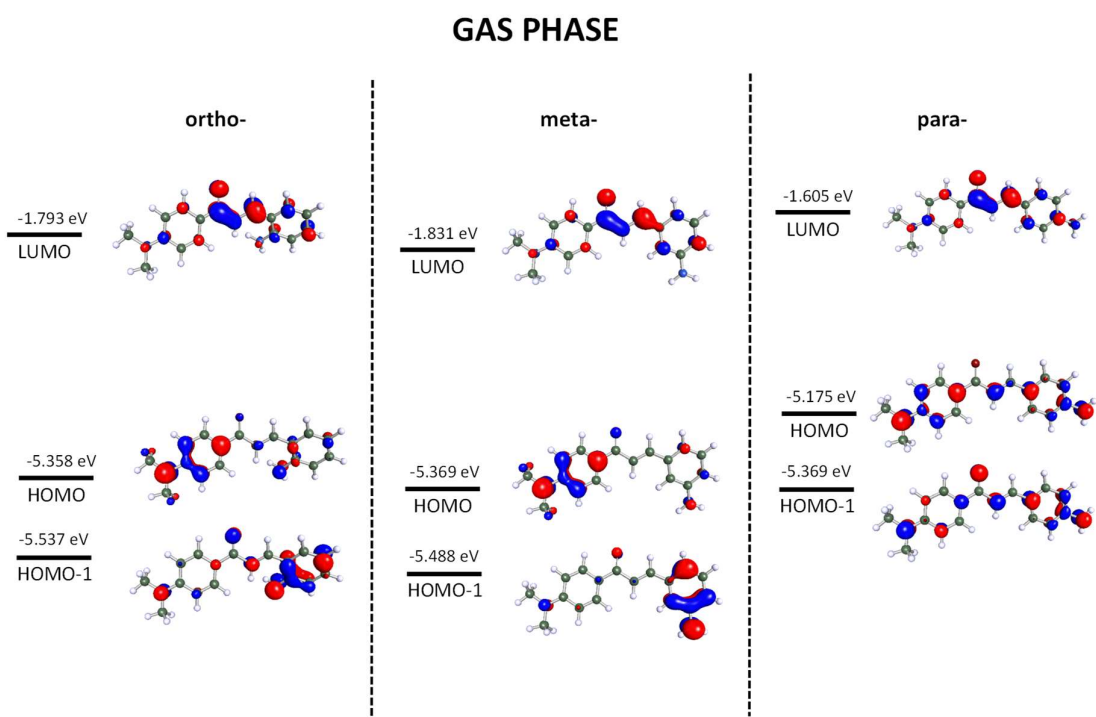

Fig S4. TD-DFT calculation (HOMO-LUMO) of **3a-c** in gas phase.

## 7. Fluorescence response of 3c with various concentrations of NTR

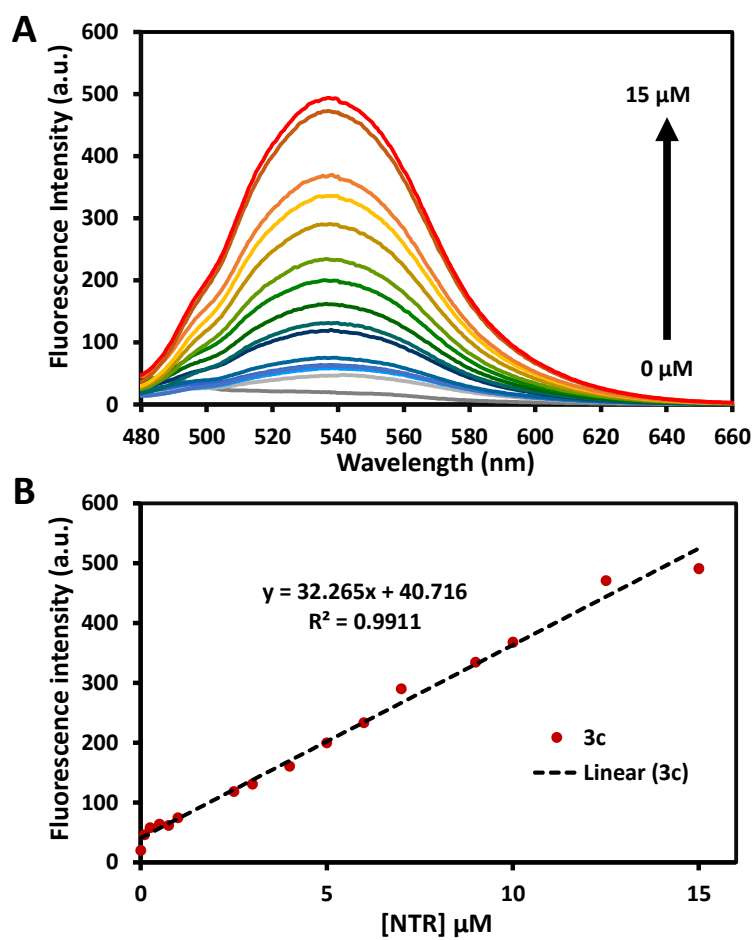

**Fig S5.** Fluorescence responses of 3c (10  $\mu\text{M}$ ) to different concentrations of nitroreductase (NTR) in PBS buffer (0.01 M, pH 7.4) with 1% DMSO and NADH (50  $\mu\text{M}$ ) at 37°C for 5 min. Excitation wavelength = 405 nm.

## 8. Detection of bacterial NTR using 3c (varies incubated time 2, 6, 12 and 24 h)

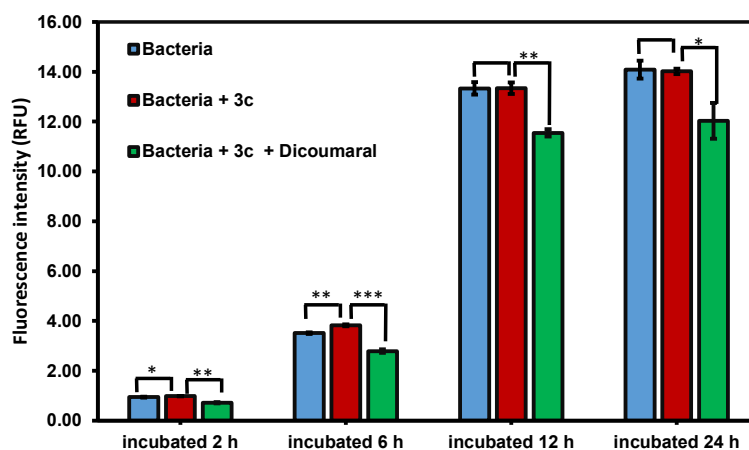

**Fig S6.** The detection of *E. coli* using NTR probe (**3c**). The fluorescence was measured at the wavelength 535 nm ( $\lambda_{\text{ex}} = 405$  nm) after the bacterial cells were treated with 10  $\mu\text{M}$  NTR probe (**3c**) with and without dicoumarol (0.2 mM) under different incubation time (2, 6, 12 and 24 h) at 37 °C. Statistical analysis is based on one-way ANOVA (\*P < 0.05, \*\*P < 0.01, \*\*\*P < 0.001)

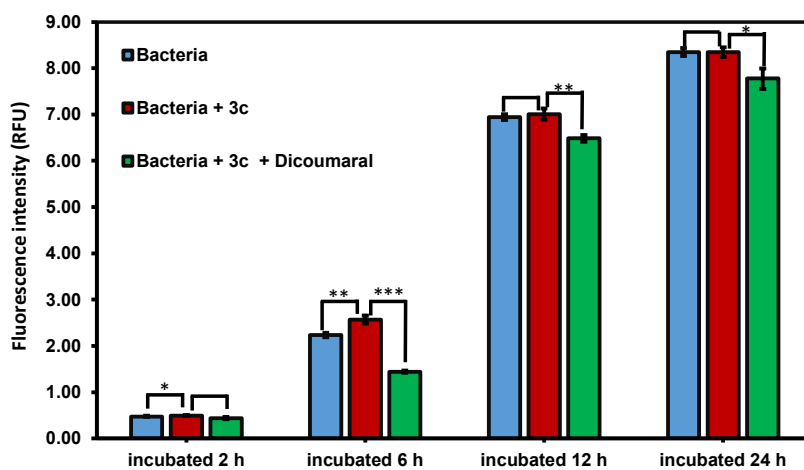

**Fig S7.** The detection of *S. aureus* using NTR probe (**3c**). The fluorescence was measured at the wavelength 535 nm ( $\lambda_{\text{ex}} = 405$  nm) after the bacterial cells were treated with 10  $\mu\text{M}$  NTR probe (**3c**) with and without dicoumarol (0.2 mM) under different incubation time (2, 6, 12 and 24 h) at 37 °C. Statistical analysis is based on one-way ANOVA (\*P < 0.05, \*\*P < 0.01, \*\*\*P < 0.001)

## 9. Detection of NTR in other bacteria strains

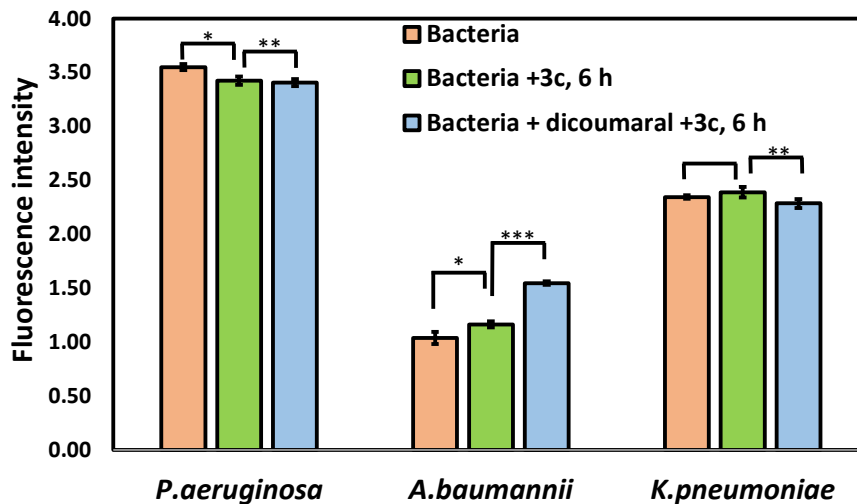

**Fig S8.** The detection of bacteria using NTR probe (**3c**). The fluorescence was measured at the wavelength 535 nm ( $\lambda_{\text{ex}} = 405$  nm) after the bacterial cells were treated with 10  $\mu\text{M}$  NTR probe (**3c**) with and without dicoumarol (0.2 mM) and incubated 6 h. Bacteria cells. PA: *P. aeruginosa*, AB: *A. baumannii*, and KP: *K. pneumoniae*. Statistical analysis is based on one-way ANOVA (\* $P < 0.05$ , \*\* $P < 0.01$ , \*\*\* $P < 0.001$ )

## 10. Overexpression and purification of NfsB

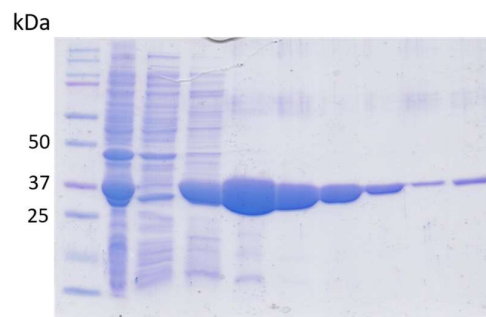

**Fig S9.** The SDS-PAGE analysis of NfsB purification. The pure fractions were collected.

## 11. HPLC analysis

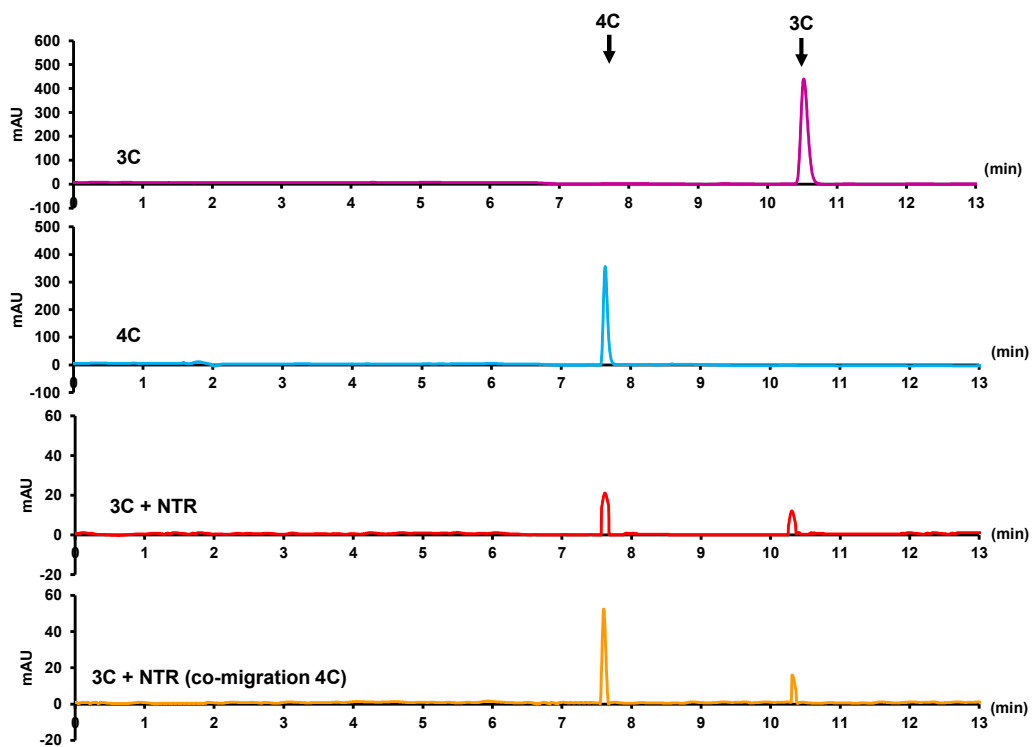

Figure S10. HPLC analysis of probe 3c reduction catalyzed by NfsB.

## 12. Linear relationship between NTR and various concentration of 3c

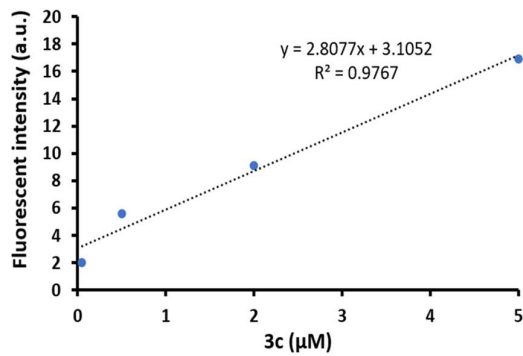

Figure S11. The calibration curve of 4c determined by fluorescence spectroscopy (Excitation: 405 nm. Emission: 535 nm).
